# Supplementary material for: Influence of HAART on Alternative Reading Frame Immune Responses over the Course of HIV-1 Infection
Source: PubMed Central journal article supplement (PMC3387156; doi:10.1371/journal.pone.0039311), 2012-06-29
Supplement: pone.0039311.s003.pdf [file pone.0039311.s003.pdf]

**Expressed Gag ARF Search Results**

| <b><u>ARF 3 (Frame 3)</u></b> |                         |                                                                                                                                                                                                                                      |                         |                       | <b><u>Query</u></b>    | <b><u>Max</u></b>      |
|-------------------------------|-------------------------|--------------------------------------------------------------------------------------------------------------------------------------------------------------------------------------------------------------------------------------|-------------------------|-----------------------|------------------------|------------------------|
| <b><u>Accession#</u></b>      | <b><u>Mechanism</u></b> | <b><u>Title</u></b>                                                                                                                                                                                                                  | <b><u>Bit Score</u></b> | <b><u>e Value</u></b> | <b><u>Coverage</u></b> | <b><u>Identity</u></b> |
| AEQ21252                      | Gross Deletion          | <a href="#"><u>Association of high frequency of gross deletions in the pol and 5'LTR/gag genes with Korean red ginseng intake in HIV-1 infected</u></a>                                                                              | 77.4                    | 2.00E-18              | 75%                    | 92%                    |
| CAC05270                      | Recom                   | <a href="#"><u>Recombinant strains of HIV type 1 in the United Kingdom</u></a>                                                                                                                                                       | 77.4                    | 4.00E-17              | 90%                    | 77%                    |
| AAP84333                      | Trunc                   | <a href="#"><u>Fine specificity and cross-clade reactivity of HIV type 1 Gag-specific CD4+ T cells</u></a>                                                                                                                           | 53.1                    | 3.00E-09              | 96%                    | 54%                    |
| AAC40703                      | Other                   | <a href="#"><u>Molecular evidence for nosocomial transmission of human immunodeficiency virus from a surgeon to one of his patients</u></a>                                                                                          | 50.8                    | 4.00E-07              | 88%                    | 50%                    |
| CAE54686                      | Recom                   | <a href="#"><u>Development, evaluation, and validation of an oligonucleotide probe hybridization assay to subtype human immunodeficiency virus type 1</u></a>                                                                        | 42                      | 2.00E-04              | 63%                    | 61%                    |
| AAF28557                      | Recom                   | <a href="#"><u>Simplified strategy for detection of recombinant human immunodeficiency virus type 1 group M isolates by gag/env heteroduplex mobility assay. Study Group on Heterogeneity of HIV Epidemics in African Cities</u></a> | 43.1                    | 3.00E-04              | 61%                    | 63%                    |
| CAF74739                      | Other                   | <a href="#"><u>Genetic subtyping of gag and env regions of HIV type 1 isolates in Republic of Congo</u></a>                                                                                                                          | 39.7                    | 0.005                 | 88%                    | 43%                    |
| CAC05266                      | Recom                   | <a href="#"><u>Recombinant strains of HIV type 1 in the United Kingdom</u></a>                                                                                                                                                       | 37                      | 0.038                 | 88%                    | 37%                    |

|          |                |                                                                                                                                                                                                                                |      |       |     |      |
|----------|----------------|--------------------------------------------------------------------------------------------------------------------------------------------------------------------------------------------------------------------------------|------|-------|-----|------|
| AAY84633 | Trunc          | <a href="#">HIV-1 specific CD4+ T cell responses are not associated with significant viral epitope variation in persons with persistent plasma viremia</a>                                                                     | 35.8 | 0.041 | 96% | 38%  |
| ABU42059 | Gross Deletion | <a href="#">High frequency of gross deletions in the 5' LTR and gag regions in HIV type 1-infected long-term survivors treated with Korean red ginseng</a>                                                                     | 36.6 | 0.071 | 71% | 49%  |
| AAF28621 | Recom          | <a href="#">Simplified strategy for detection of recombinant human immunodeficiency virus type 1 group M isolates by gag/env heteroduplex mobility assay. Study Group on Heterogeneity of HIV Epidemics in African Cities.</a> | 36.2 | 0.1   | 44% | 65%  |
| ABI80019 | Other          | <a href="#">Selection on the human immunodeficiency virus type 1 proteome following primary infection</a>                                                                                                                      | 33.5 | 0.74  | 28% | 100% |
| CAF74725 | Other          | <a href="#">Genetic subtyping of gag and env regions of HIV type 1 isolates in</a>                                                                                                                                             | 32.7 | 1.5   | 88% | 37%  |
| CAA09506 | Other          | <a href="#">HIV type 2 pathogenicity is not related to subtype in rural Guinea Bissau</a>                                                                                                                                      | 31.2 | 4.2   | 88% | 37%  |

**ARF 8 (Frame 2)**

| <u>Accession#</u> | <u>Mechanism</u> | <u>Title</u>                                                                                                                                                                        | <u>Bit Score</u> | <u>e Value</u> | <u>Query Coverage</u> | <u>Max Identity</u> |
|-------------------|------------------|-------------------------------------------------------------------------------------------------------------------------------------------------------------------------------------|------------------|----------------|-----------------------|---------------------|
| AAB49839          | Recom            | <a href="#">Human immunodeficiency virus type 1 subtypes defined by env show high frequency of recombinant gag genes. The UNAIDS Network for HIV Isolation and Characterization</a> | 44.8             | 1.00E-04       | 54%                   | 100%                |
| CAA82791          | Other            | <a href="#">Molecular epidemiology of HIV-1 in Madrid</a>                                                                                                                           | 32               | 2.9            | 36%                   | 100%                |
| CAA82789          | Other            | <a href="#">Molecular epidemiology of HIV-1 in Madrid</a>                                                                                                                           | 32               | 2.9            | 36%                   | 100%                |

|          |       |                                                                         |      |     |     |      |
|----------|-------|-------------------------------------------------------------------------|------|-----|-----|------|
| CAA82792 | Other | <a href="#">Molecular epidemiology of HIV-1 in Madrid</a>               | 32   | 2.9 | 36% | 100% |
| CAA82790 | Other | <a href="#">Molecular epidemiology of HIV-1 in Madrid</a>               | 32   | 2.9 | 36% | 100% |
| CAA82788 | Other | <a href="#">Molecular epidemiology of HIV-1 in Madrid</a>               | 32   | 2.9 | 36% | 100% |
| CAA82796 | Other | <a href="#">Molecular epidemiology of HIV-1 in Madrid</a>               | 32   | 2.9 | 36% | 100% |
| CAC05266 | Recom | <a href="#">Recombinant strains of HIV type 1 in the United Kingdom</a> | 27.4 | 124 | 77% | 59%  |

#### **Expressed Pol ARF Search Results**

##### **ARF-20 (Frame 2)**

| <b><u>Accession#</u></b> | <b><u>Mechanism</u></b> | <b><u>Title</u></b>                                                                                                                                             | <b><u>Bit Score</u></b> | <b><u>e Value</u></b> | <b><u>Query Coverage</u></b> | <b><u>Max Identity</u></b> |
|--------------------------|-------------------------|-----------------------------------------------------------------------------------------------------------------------------------------------------------------|-------------------------|-----------------------|------------------------------|----------------------------|
| AAY29809                 | Trunc                   | <a href="#">A Novel Assay Allows Genotyping of the Latent Reservoir for Human Immunodeficiency Virus Type 1 in the Resting CD4+ T Cells of Viremic Patients</a> | 51                      | 3.00E-07              | 77%                          | 100%                       |
| AAL85844                 | Other                   | <a href="#">Demonstration of de Novo HIV Type 1 Production by Detection of Multiply Spliced and Unspliced HIV Type 1 RNA in Paraffin-</a>                       | 29.9                    | 8.7                   | 44%                          | 100%                       |

##### **ARF-23 (Frame 2)**

| <b><u>Accession#</u></b> | <b><u>Mechanism</u></b> | <b><u>Title</u></b>                                                         | <b><u>Bit Score</u></b> | <b><u>e Value</u></b> | <b><u>Query Coverage</u></b> | <b><u>Max Identity</u></b> |
|--------------------------|-------------------------|-----------------------------------------------------------------------------|-------------------------|-----------------------|------------------------------|----------------------------|
| CAF29000                 | Other                   | <a href="#">Antiviral activity of reverse transcriptase inhibitors with</a> | 86.3                    | 8.00E-19              | 100%                         | 93%                        |
| AAZ91644                 | Other                   | <a href="#">Genomic Diversity of HIV-1 subtypes in Northern Kenya</a>       | 78.3                    | 5.00E-16              | 96%                          | 82%                        |
| AAZ91642                 | Other                   | <a href="#">Genomic Diversity of HIV-1 subtypes in Northern Kenya</a>       | 77.4                    | 1.00E-15              | 100%                         | 86%                        |
| AAS79329                 | Other                   | <a href="#">Documentation of subtype C HIV Type 1 strains in Argentina,</a> | 63                      | 1.00E-10              | 89%                          | 77%                        |

|          |              |                                                                                                                                                                        |      |       |     |     |
|----------|--------------|------------------------------------------------------------------------------------------------------------------------------------------------------------------------|------|-------|-----|-----|
| AAN40299 | Other        | <a href="#">HIV-1 subtypes in Luxembourg, 1983-2000</a>                                                                                                                | 41.8 | 0.003 | 62% | 64% |
| AAZ91645 | Trunc        | <a href="#">Genomic Diversity of HIV-1 subtypes in Northern Kenya</a>                                                                                                  | 41.4 | 0.004 | 62% | 72% |
| AAU13857 | Other        | <a href="#">Molecular Epidemiology of HIV-1 in Thailand</a>                                                                                                            | 38   | 0.054 | 41% | 92% |
| AAL70819 | Other        | <a href="#">Multiple viral genetic analyses detect low-level human immunodeficiency virus type 1 replication during effective highly active antiretroviral therapy</a> | 35.4 | 0.44  | 37% | 91% |
| AEL30637 | Other        | <a href="#">Genetic diversity and drug resistance profiles in HIV-1 infected patients from Cape Verde Islands</a>                                                      | 33.3 | 2.4   | 37% | 82% |
| AAS76977 | Other        | <a href="#">Overview of genotypic and clinical profiles of human immunodeficiency virus type 1-infected children in Rio de Janeiro, Brazil</a>                         | 32.9 | 3.3   | 34% | 90% |
| ABB89863 | Single Point | <a href="#">Comparative selection of the K65R and M184V/I mutations in human immunodeficiency virus type 1-infected patients enrolled in a trial</a>                   | 32   | 6.5   | 41% | 75% |
| ABU89197 | Recom        | <a href="#">Highly divergent subtypes and new recombinant forms prevail in the HIV/AIDS epidemic in Angola: new insights into the origins of the Aids pandemic</a>     | 32   | 6.7   | 68% | 52% |
| AAQ74952 | Other        | <a href="#">Molecular epidemiologic study of a human immunodeficiency virus 1</a>                                                                                      | 29.9 | 35    | 48% | 57% |

**ARF 32 (Frame 2)**

| <u>Accession#</u> | <u>Mechanism</u> | <u>Title</u>                                                                                                                                                                                      | <u>Bit Score</u> | <u>e Value</u> | <u>Query Coverage</u> | <u>Max Identity</u> |
|-------------------|------------------|---------------------------------------------------------------------------------------------------------------------------------------------------------------------------------------------------|------------------|----------------|-----------------------|---------------------|
| ADZ33585          | Other            | <a href="#">Direct Submission</a>                                                                                                                                                                 | 68.9             | 3.00E-13       | 100%                  | 95%                 |
| CAC86176          | Other            | <a href="#">Resistance to antiretroviral treatment in Gabon: need for implementation of guidelines on antiretroviral therapy use and HIV-1 drug resistance monitoring in developing countries</a> | 44.8             | 9.00E-05       | 66%                   | 93%                 |
| AAY25729          | Other            | <a href="#">Molecular epidemiology of HIV Type 1 in preparation for a Phase III prime-boost vaccine trial in Thailand and a new approach to HIV Type 1 genotyping</a>                             | 41.4             | 0.001          | 71%                   | 80%                 |

**ARF 33 (Frame 1)**

| <u>Accession#</u> | <u>Mechanism</u> | <u>Title</u>                                                                                                                                   | <u>Bit Score</u> | <u>e Value</u> | <u>Query Coverage</u> | <u>Max Identity</u> |
|-------------------|------------------|------------------------------------------------------------------------------------------------------------------------------------------------|------------------|----------------|-----------------------|---------------------|
| ADP94121          | Other            | <a href="#">Analysis of pol integrase gene sequences of HIV-1 infected treatment naive individuals in the Limpopo province of South Africa</a> | 45.6             | 1.00E-05       | 76%                   | 81%                 |

**ARF 37 (Frame 2)**

| <u>Accession#</u> | <u>Mechanism</u> | <u>Title</u>                                                                                                                 | <u>Bit Score</u> | <u>e Value</u> | <u>Query Coverage</u> | <u>Max Identity</u> |
|-------------------|------------------|------------------------------------------------------------------------------------------------------------------------------|------------------|----------------|-----------------------|---------------------|
| AAY57410          | Trunc            | <a href="#">Genetic characterization of full-length HIV type 1 genomes from 3 infected paid blood donors in Henan, China</a> | 75.9             | 1.00E-15       | 74%                   | 83%                 |
| AAZ94952          | Other            | <a href="#">Genetic Diversity of HIV-1 in Northern Kenya</a>                                                                 | 45.1             | 2.00E-05       | 54%                   | 77%                 |
| CAA08123          | Other            | <a href="#">HIV type 2 pathogenicity is not related to subtype in rural Guinea Bissau</a>                                    | 45.4             | 2.00E-05       | 98%                   | 44%                 |
| CAA08092          | Other            | <a href="#">HIV type 2 pathogenicity is not related to subtype in rural Guinea Bissau</a>                                    | 43.9             | 9.00E-05       | 98%                   | 63%                 |

|          |       |                                                                                                                           |      |       |     |     |
|----------|-------|---------------------------------------------------------------------------------------------------------------------------|------|-------|-----|-----|
| AAZ94959 | Other | <a href="#">Genetic Diversity of HIV-1 in Northern Kenya</a>                                                              | 36.6 | 0.043 | 43% | 75% |
| CAA08033 | Other | <a href="#">HIV type 2 pathogenicity is not related to subtype in rural Guinea Bissau</a>                                 | 35.4 | 0.14  | 98% | 35% |
| AAZ94969 | Other | <a href="#">Genetic Diversity of HIV-1 in Northern Kenya</a>                                                              | 35   | 0.16  | 61% | 53% |
| ABD52825 | Other | <a href="#">HIV Type 1 Subtypes among STI Patients in Nairobi: A Genotypic Study Based on Partial pol Gene Sequencing</a> | 33.9 | 0.37  | 34% | 79% |
| AAZ94981 | Other | <a href="#">Genetic Diversity of HIV-1 in Northern Kenya</a>                                                              | 32.3 | 1.6   | 43% | 67% |
| ABD52822 | Other | <a href="#">HIV Type 1 Subtypes among STI Patients in Nairobi: A Genotypic Study Based on Partial pol Gene Sequencing</a> | 31.6 | 2.8   | 34% | 79% |
| ABD52821 | Other | <a href="#">HIV Type 1 Subtypes among STI Patients in Nairobi: A Genotypic Study Based on Partial pol Gene Sequencing</a> | 30.8 | 5.6   | 38% | 67% |

**Expressed Env ARF Search Results**

**ARF 62 (Frame 2)**

| <u>Accession#</u> | <u>Mechanism</u> | <u>Title</u>                                                                                                                                                                                                                                                          | <u>Bit Score</u> | <u>e Value</u> | <u>Query Coverage</u> | <u>Max Identity</u> |
|-------------------|------------------|-----------------------------------------------------------------------------------------------------------------------------------------------------------------------------------------------------------------------------------------------------------------------|------------------|----------------|-----------------------|---------------------|
| ADA84563          | Other            | <a href="#">Characterization of emergent HIV resistance in treatment-naive subjects enrolled in a vicriviroc phase 2 trial</a>                                                                                                                                        | 41.4             | 6.00E-04       | 100%                  | 81%                 |
| AAB05195          | Other            | <a href="#">HIV type 1 variation in World Health Organization-sponsored vaccine evaluation sites: genetic screening, sequence analysis, and preliminary biological characterization of selected viral strains. WHO Network for HIV Isolation and Characterization</a> | 38.8             | 0.005          | 93%                   | 73%                 |

|          |             |                                                                                                                                                                                      |      |       |     |     |
|----------|-------------|--------------------------------------------------------------------------------------------------------------------------------------------------------------------------------------|------|-------|-----|-----|
| AAK77505 | Other       | <a href="#">Genetic analysis of the complete gag and env genes of HIV type 1 subtype C primary isolates from South Africa</a>                                                        | 35.8 | 0.052 | 68% | 82% |
| ADP37054 | Other       | <a href="#">Direct Submission</a>                                                                                                                                                    | 35   | 0.1   | 68% | 82% |
| ADA84557 | Other       | <a href="#">Characterization of emergent HIV resistance in treatment-naïve subjects enrolled in a vicriviroc phase 2 trial</a>                                                       | 32   | 1.2   | 81% | 77% |
| ACS91274 | Recom/Trunc | <a href="#">Longitudinal quasispecies analysis of viral variants in HIV type 1 dually infected individuals highlights the importance of sequence identity in viral recombination</a> | 30.3 | 4.7   | 68% | 73% |
| AAL11074 | Recom       | <a href="#">Human immunodeficiency virus type 1 clade A and D neurotropism: molecular evolution, recombination, and coreceptor use</a>                                               | 30.3 | 4.8   | 56% | 89% |

**ARF-65 (Frame 1)**

| <u>Accession#</u> | <u>Mechanism</u> | <u>Title</u>                                                                                                                                                                         | <u>Bit Score</u> | <u>e Value</u> | <u>Query Coverage</u> | <u>Max Identity</u> |
|-------------------|------------------|--------------------------------------------------------------------------------------------------------------------------------------------------------------------------------------|------------------|----------------|-----------------------|---------------------|
| AAB61425          | Other            | <a href="#">Development of AIDS in a chimpanzee infected with human immunodeficiency virus type 1</a>                                                                                | 57.5             | 2.00E-09       | 90%                   | 89%                 |
| AEB00525          | Other            | <a href="#">Independent evolution of variable and constant regions of human immunodeficiency virus type 1 (HIV-1) env glycoprotein gp120</a>                                         | 47.3             | 9.00E-06       | 85%                   | 82%                 |
| ADA84548          | Other            | <a href="#">Characterization of emergent HIV resistance in treatment-naïve subjects enrolled in a vicriviroc phase 2 trial</a>                                                       | 45.6             | 4.00E-05       | 70%                   | 86%                 |
| ACT53938          | Recom            | <a href="#">Longitudinal quasispecies analysis of viral variants in HIV type 1 dually infected individuals highlights the importance of sequence identity in viral recombination</a> | 43.9             | 1.00E-04       | 65%                   | 92%                 |

|          |       |                                                                                                                                                                                      |      |          |     |     |
|----------|-------|--------------------------------------------------------------------------------------------------------------------------------------------------------------------------------------|------|----------|-----|-----|
| CAA12240 | Other | <a href="#">The subtypes of HIV type 1 in Greece</a>                                                                                                                                 | 43.5 | 2.00E-04 | 70% | 86% |
| ABS89899 | Other | <a href="#">Characteristics of HIV type 1 (HIV-1) glycoprotein 120 env sequences in mother-infant pairs infected with HIV-1 subtype CRF01_AE</a>                                     | 43.5 | 2.00E-04 | 85% | 71% |
| AAC33082 | Recom | <a href="#">HIV-1 genetic subtype A/B recombinant strain causing an explosive epidemic in injecting drug users in Kaliningrad</a>                                                    | 42.2 | 6.00E-04 | 60% | 92% |
| ACT54220 | Recom | <a href="#">Longitudinal quasispecies analysis of viral variants in HIV type 1 dually infected individuals highlights the importance of sequence identity in viral recombination</a> | 32.5 | 1.6      | 55% | 82% |
| ACS91252 | Recom | <a href="#">Longitudinal quasispecies analysis of viral variants in HIV type 1 dually infected individuals highlights the importance of sequence identity in viral recombination</a> | 30.8 | 6.2      | 50% | 80% |
| ADP55165 | Recom | <a href="#">HIV-1 subtype distribution in the Gambia and the significant presence of CRF49_cpx, a novel circulating recombinant form</a>                                             | 27.4 | 99       | 50% | 80% |
| ADP55144 | Recom | <a href="#">HIV-1 subtype distribution in the Gambia and the significant presence of CRF49_cpx, a novel circulating recombinant form</a>                                             | 27.4 | 99       | 50% | 80% |

**ARF 67 (Frame 2)**

| <u>Accession#</u> | <u>Mechanism</u> | <u>Title</u>                                                                                                                                      | <u>Bit Score</u> | <u>e Value</u> | <u>Query Coverage</u> | <u>Max Identity</u> |
|-------------------|------------------|---------------------------------------------------------------------------------------------------------------------------------------------------|------------------|----------------|-----------------------|---------------------|
| AAL78125          | Other            | <a href="#">Human immunodeficiency virus type 1 bound to B cells: relationship to virus replicating in CD4+ T cells and circulating in plasma</a> | 71.5             | 8.00E-14       | 92%                   | 92%                 |
| ABI80936          | Trunc            | <a href="#">Selection on the human immunodeficiency virus type 1 proteome following primary infection</a>                                         | 71.5             | 8.00E-14       | 92%                   | 92%                 |



|          |              |                                                                                                                                                                                            |      |          |      |     |
|----------|--------------|--------------------------------------------------------------------------------------------------------------------------------------------------------------------------------------------|------|----------|------|-----|
| AAL29365 | Single Point | <a href="#">T69D/N pol mutation, human immunodeficiency virus type 1 RNA levels, and syncytium-inducing phenotype are associated with CD4 cell depletion during didanosine therapy.</a>    | 68.9 | 6.00E-13 | 100% | 85% |
| ACA49454 | Other        | <a href="#">High frequency of BF mosaic genomes among HIV-1-infected children from Sao Paulo, Brazil</a>                                                                                   | 64.7 | 2.00E-11 | 100% | 81% |
| AAC05790 | Other        | <a href="#">Human immunodeficiency virus type 1 subtypes B and C detected in New Zealand</a>                                                                                               | 60.9 | 4.00E-10 | 84%  | 82% |
| AAF28097 | Other        | <a href="#">The explosive human immunodeficiency virus type 1 epidemic among injecting drug users of Kathmandu, Nepal, is caused by a subtype C virus of restricted genetic diversity.</a> | 59.6 | 1.00E-09 | 84%  | 82% |
| ABI79981 | Other        | <a href="#">Selection on the human immunodeficiency virus type 1 proteome following primary infection</a>                                                                                  | 58.7 | 2.00E-09 | 76%  | 90% |
| ABI79972 | Other        | <a href="#">Selection on the human immunodeficiency virus type 1 proteome following primary infection</a>                                                                                  | 58.7 | 2.00E-09 | 76%  | 90% |
| ABI79963 | Other        | <a href="#">Selection on the human immunodeficiency virus type 1 proteome following primary infection</a>                                                                                  | 58.7 | 2.00E-09 | 76%  | 90% |
| ABI79955 | Other        | <a href="#">Selection on the human immunodeficiency virus type 1 proteome following primary infection</a>                                                                                  | 58.7 | 2.00E-09 | 76%  | 90% |
| CAJ77398 | Recom        | <a href="#">HIV-1 subtypes and recombinants in the Republic of Congo</a>                                                                                                                   | 58.3 | 3.00E-09 | 84%  | 86% |
| AAM46030 | Other        | <a href="#">HIV type 1 group M clades infecting subjects from rural villages in equatorial rain forests of Cameroon</a>                                                                    | 56.6 | 1.00E-08 | 84%  | 82% |

|          |       |                                                                                                                                                                                                                                           |      |          |     |     |
|----------|-------|-------------------------------------------------------------------------------------------------------------------------------------------------------------------------------------------------------------------------------------------|------|----------|-----|-----|
| ADE61834 | Trunc | <a href="#"><u>4E10-resistant HIV-1 isolated from four subjects with rare membrane-proximal external region polymorphisms</u></a>                                                                                                         | 56.6 | 1.00E-08 | 84% | 77% |
| CAD87076 | Other | <a href="#"><u>Biological and genetic characteristics of HIV infections in Cameroon reveals dual group M and O infections and a correlation between SI-inducing phenotype of the predominant CRF02_AG variant and disease stage.</u></a>  | 52.4 | 4.00E-07 | 92% | 75% |
| CAC15260 | Other | <a href="#"><u>Unprecedented degree of human immunodeficiency virus type 1 (HIV-1) group M genetic diversity in the Democratic Republic of Congo suggests that the HIV-1 pandemic originated in Central Africa</u></a>                    | 48.6 | 8.00E-06 | 84% | 73% |
| ABI80924 | Other | <a href="#"><u>Selection on the human immunodeficiency virus type 1 proteome following primary infection</u></a>                                                                                                                          | 47.7 | 2.00E-05 | 65% | 88% |
| AAC58921 | Other | <a href="#"><u>Immunological and virological analyses of persons infected by human immunodeficiency virus type 1 while participating in trials of recombinant gp120 subunit vaccines</u></a>                                              | 44.8 | 2.00E-04 | 73% | 79% |
| AAX38743 | Other | <a href="#"><u>In-depth, longitudinal analysis of viral quasispecies from an individual triply infected with late-stage human immunodeficiency virus type 1, using a multiple PCR primer approach</u></a>                                 | 44.8 | 2.00E-04 | 53% | 93% |
| ADZ39073 | Trunc | <a href="#"><u>Clonal Sequences Recovered from Plasma from Patients with Residual HIV-1 Viremia and on Intensified Antiretroviral Therapy Are Identical to Replicating Viral RNAs Recovered from Circulating Resting CD4+ T Cells</u></a> | 43.9 | 3.00E-04 | 73% | 79% |

|          |       |                                                                                                                                                                                                                                                 |      |       |     |      |
|----------|-------|-------------------------------------------------------------------------------------------------------------------------------------------------------------------------------------------------------------------------------------------------|------|-------|-----|------|
| AAU14919 | Recom | <a href="#">Identification of a novel HIV-1 complex circulating recombinant form (CRF18_cpx) of Central African origin in Cuba</a>                                                                                                              | 41.4 | 0.003 | 73% | 68%  |
| AAK01777 | Other | <a href="#">Use of drug resistance sequence data for the systematic detection of non-B human immunodeficiency virus type 1 (HIV-1) subtypes: how to create a sentinel site for monitoring the genetic diversity of HIV-1 at a country scale</a> | 40.5 | 0.005 | 42% | 100% |
| ACL98565 | Other | <a href="#">Genetic characterization of HIV-1 from semen and blood from clade C-infected subjects from India and effect of therapy in these body compartments</a>                                                                               | 40.5 | 0.005 | 46% | 92%  |
| ABF55180 | Other | <a href="#">Emergence of ART resistance associated primary mutations among drug naive HIV-1 individuals in rural western Cameroon</a>                                                                                                           | 40.1 | 0.007 | 50% | 92%  |
| AAT07385 | Other | <a href="#">Genetic diversity of HIV type 1 in rural eastern Cameroon</a>                                                                                                                                                                       | 39.2 | 0.015 | 50% | 85%  |
| AAC58924 | Recom | <a href="#">Immunological and virological analyses of persons infected by human immunodeficiency virus type 1 while participating in trials of recombinant gp120 subunit vaccines.</a>                                                          | 39.2 | 0.015 | 50% | 92%  |
| AAY19639 | Other | <a href="#">Transmission of cell-free and cell-associated HIV-1 through breast-feeding</a>                                                                                                                                                      | 38.4 | 0.029 | 57% | 80%  |
| AAT07383 | Other | <a href="#">Genetic diversity of HIV type 1 in rural eastern Cameroon</a>                                                                                                                                                                       | 38   | 0.041 | 61% | 75%  |
| ABY71536 | Other | <a href="#">Genetic and Neutralization Properties of HIV-1 env Clones from Subtype B/BC/AE Infections in China</a>                                                                                                                              | 37.1 | 0.083 | 42% | 91%  |
| AAO86401 | Other | <a href="#">The pathogenesis of three different human immunodeficiency virustype 1 populations in a triply-infected patient</a>                                                                                                                 | 36.7 | 0.11  | 53% | 79%  |

|          |       |                                                                                                                                                                                                                                         |      |      |      |     |
|----------|-------|-----------------------------------------------------------------------------------------------------------------------------------------------------------------------------------------------------------------------------------------|------|------|------|-----|
| ADA84563 | Other | <a href="#"><u>Characterization of emergent HIV resistance in treatment-naïve subjects enrolled in a vicriviroc phase 2 trial</u></a>                                                                                                   | 36.7 | 0.12 | 57%  | 80% |
| AAU85704 | Recom | <a href="#"><u>HIV-1 subtype and viral tropism determination for evaluating antiretroviral therapy options: an analysis of archived Kenyan blood samples</u></a>                                                                        | 33.7 | 1.2  | 50%  | 77% |
| CAD87251 | Other | <a href="#"><u>Biological and genetic characteristics of HIV infections in Cameroon reveals dual group M and O infections and a correlation between SI-inducing phenotype of the predominant CRF02_AG variant and disease stage</u></a> | 32.5 | 3.4  | 100% | 50% |
| AAT07360 | Other | <a href="#"><u>Genetic diversity of HIV type 1 in rural eastern Cameroon</u></a>                                                                                                                                                        | 32   | 4.7  | 57%  | 73% |
| CAD87059 | Other | <a href="#"><u>Biological and genetic characteristics of HIV infections in Cameroon reveals dual group M and O infections and a correlation between SI-inducing phenotype of the predominant CRF02_AG variant and disease stage</u></a> | 32   | 4.8  | 53%  | 71% |
| CAD87120 | Other | <a href="#"><u>Biological and genetic characteristics of HIV infections in Cameroon reveals dual group M and O infections and a correlation between SI-inducing phenotype of the predominant CRF02_AG variant and disease stage</u></a> | 30.8 | 13   | 50%  | 85% |
| CAJ77397 | Recom | <a href="#"><u>HIV-1 subtypes and recombinants in the Republic of Congo</u></a>                                                                                                                                                         | 29.5 | 36   | 80%  | 57% |
| CAD36353 | Other | <a href="#"><u>High genetic diversity of HIV-1 strains in Chad, West Central Africa</u></a>                                                                                                                                             | 29.5 | 36   | 76%  | 55% |

|                           |                         |                                                                                                                                                                          |                         |                       |                              |                            |
|---------------------------|-------------------------|--------------------------------------------------------------------------------------------------------------------------------------------------------------------------|-------------------------|-----------------------|------------------------------|----------------------------|
| AAX48987                  | Other                   | <a href="#">Molecular Characteristics of HIV Type 1 Circulating in Sao Paulo, Brazil</a>                                                                                 | 29.1                    | 51                    | 73%                          | 63%                        |
| <b>ARF 70 (Frame 1)</b>   |                         |                                                                                                                                                                          |                         |                       |                              |                            |
| <b><u>Accession #</u></b> | <b><u>Mechanism</u></b> | <b><u>Title</u></b>                                                                                                                                                      | <b><u>Bit Score</u></b> | <b><u>e Value</u></b> | <b><u>Query Coverage</u></b> | <b><u>Max Identity</u></b> |
| ABC88325                  | Recom                   | <a href="#">Analysis of the near full length genomes of HIV-1 subtypes B, F and BF recombinant from a cohort of 14 patients in Sao Paulo, Brazil</a>                     | 58.3                    | 1.00E-09              | 100%                         | 89%                        |
| AAA97843                  | Other                   | <a href="#">Adaptive Evolution of Human Immunodeficiency Virus Type 1 During the Natural Course of Infection</a>                                                         | 54.9                    | 2.00E-08              | 100%                         | 89%                        |
| AAG15920                  | Trunc                   | <a href="#">Human immunodeficiency virus type 1 shedding pattern in semen correlates with the compartmentalization of viral Quasi species between blood and semen</a>    | 50.7                    | 5.00E-07              | 84%                          | 94%                        |
| AAK66422                  | Trunc                   | <a href="#">A Persistent Reservoir for HIV-1 in Alveolar Macrophages</a>                                                                                                 | 41.8                    | 7.00E-04              | 84%                          | 81%                        |
| ADO24389                  | Other                   | <a href="#">Molecular viral factors in Human immunodeficiency virus type-1 mother-to-child transmission: characterization of a group of infected mothers from Oporto</a> | 38                      | 0.015                 | 84%                          | 81%                        |
| ABW37206                  | Other                   | <a href="#">Impact of HIV-1 genetic diversity in China on the measurement of viral load</a>                                                                              | 34.1                    | 0.34                  | 47%                          | 100%                       |
| BAE95924                  | Other                   | <a href="#">Infectious DNA clones of subtype G and CRF02_AG HIV-1 derived from Ghananian isolates</a>                                                                    | 29.5                    | 15                    | 57%                          | 82%                        |

**ARF 71 (Frame 1)**

| <u>Accession #</u> | <u>Mechanism</u> | <u>Title</u>                                                                                                                                                                             | <u>Bit Score</u> | <u>e Value</u> | <u>Query Coverage</u> | <u>Max Identity</u> |
|--------------------|------------------|------------------------------------------------------------------------------------------------------------------------------------------------------------------------------------------|------------------|----------------|-----------------------|---------------------|
| AAB52796           | Other            | <a href="#">Analysis of the V1-V5 env region in Long-Term Non Progressor and in rapid progressor HIV-1 infected individuals</a>                                                          | 35.8             | 0.073          | 88%                   | 75%                 |
| AAR95931           | Other            | <a href="#">Evidence that low-level viremias during effective highly active antiretroviral therapy result from two processes: expression of archival virus and replication of virus</a>  | 35.4             | 0.1            | 66%                   | 83%                 |
| AAL29458           | Trunc            | <a href="#">Multiprotein-expressing DNA Component for a DNA/MVA Vaccine for HIV-1</a>                                                                                                    | 35               | 0.15           | 94%                   | 71%                 |
| AEP93955           | Other            | <a href="#">Impact of Mutations Outside the V3 Region on Coreceptor Tropism Phenotypically Assessed in Patients Infected with HIV-1 Subtype B</a>                                        | 34.6             | 0.21           | 100%                  | 70%                 |
| ABC88325           | Other            | <a href="#">Analysis of the near full length genomes of HIV-1 subtypes B, F and BF recombinant from a cohort of 14 patients in Sao Paulo, Brazil</a>                                     | 32.9             | 0.82           | 74%                   | 71%                 |
| AAR95932           | Other            | <a href="#">Evidence that low-level viremias during effective highly active antiretroviral therapy result from two processes: expression of archival virus and replication of virus.</a> | 31.6             | 2.3            | 55%                   | 90%                 |
| ADF84309           | Trunc            | <a href="#">Adaptive interactions between HLA and HIV-1: highly divergent selection imposed by HLA class I molecules with common supertype motifs</a>                                    | 29.5             | 13             | 88%                   | 63%                 |
| AAP59056           | Other            | <a href="#">Compartmentalization and migration of HIV-1 between peripheral blood and cerebrospinal fluid</a>                                                                             | 29.1             | 18             | 88%                   | 61%                 |
