# Supplementary material for: Influence of HAART on Alternative Reading Frame Immune Responses over the Course of HIV-1 Infection
Source: PubMed Central journal article supplement (PMC3387156; doi:10.1371/journal.pone.0039311), 2012-06-29
Supplement: pone.0039311.s004.pdf [file pone.0039311.s004.pdf]

# Supplemental Table S4

| <i>peptide #</i> | <i>Peptide name</i> | <i>Sequence</i> | <i>POOL #</i> |
|------------------|---------------------|-----------------|---------------|
| 378              | Splice TAT leader   | SRDIHHYFR       | 1             |
| 379              | Splice REV leader   | RIFTIVSD        | 1             |
| 400              | A2ORF_08K19         | KLQNGIECI       | 2             |
| 401              | A2ORF_45K19         | KLGDGFIDI       | 2             |
| 402              | A2ORF_62AL9         | AMCKINPTL       | 2             |
| 403              | A2ORF_65VV9         | VQMSAQYNV       | 2             |
| 404              | A2ORF_33TV9         | TVIGEQWLV       | 2             |
| 405              | A2ORF_65AL9         | AQYNVHML        | 2             |
| * 406            | B7ORF_03QF9         | QPRSDTHVF       | 2             |
| 407              | B7ORF_70ML9         | MPLPSVDKL       | 2             |
| 408              | B7ORF_37YQ9         | YPGSSSCSQ       | 2             |
| 409              | B7ORF_37RF9         | RAGNSIFSF       | 2             |
| 410              | B7ORF_70LV9         | LPSVDKLDV       | 2             |
| 411              | B58ORF_37RF9        | RAGNSIFSF       | 3             |
| 412              | B58ORF_32RW9        | RSRNLRCRW       | 3             |
| 413              | B58ORF_37SY9        | SSSCSQWIY       | 3             |
| 414              | B58ORF_65MM9        | MSAQYNVHM       | 3             |
| 415              | B58ORF_37KY9        | KMASKNNTY       | 3             |
| 416              | B58ORF_03RI9        | RSDTHVFSI       | 3             |
| 417              | B58ORF_33NW9        | NITVIGEQW       | 3             |
| 418              | B58ORF_71RI9        | RSSDLEEEI       | 3             |
| 419              | B58ORF_20KF9        | KNDRGNWRF       | 3             |
| 420              | B58ORF_23KW9        | KGRENFKNW       | 3             |
| 421              | B58ORF_67SW9        | SNVCPSHQW       | 3             |
| 422              | A2ORF_092YL9        | YLYNSLLQL       | 4             |
| 423              | A2ORF_092KL9        | KISDSLLLL       | 4             |
| 424              | A2ORF_092AL9        | ALFSLCTTL       | 4             |
| 425              | A2ORF_092VL9        | VLLNSCVEL       | 4             |
| 426              | A2ORF_092HL9        | HMFIFCIL        | 4             |
| 427              | A2ORF_092TL9        | TLYLYNSLL       | 4             |
| 428              | A2ORF_092SL9        | LLLLPPPSL       | 4             |
| 429              | A2ORF_092SL9        | SLISPPGGL       | 4             |
| 430              | A2ORF_092RV9        | RVIVSLPSV       | 4             |
| 431              | A2ORF_092SV9        | SVIEAAPIV       | 4             |
| 432              | A2ORF_092FV9        | FILHGRVIV       | 5             |
| 433              | A2ORF_092SI9        | SLVNSSPVI       | 5             |
| 434              | A2ORF_092LV9        | LLLLPPSLV       | 5             |
| 435              | A2ORF_092TA9        | TLLFALVGA       | 5             |
| 436              | B7ORF_092AA9        | APKNPRNKA       | 5             |
| 437              | B7ORF_092FI9        | FPTFCHMFI       | 5             |
| 438              | B7ORF_092SL9        | SPVIFDEHL       | 5             |
| 439              | B7ORF_092CI9        | CPLMGGAYI       | 5             |
| 440              | B7ORF_092IC9        | IPDNNCLAC       | 5             |
| 441              | B58ORF_092IM9       | IAFPFTCHM       | 6             |
| 442              | B58ORF_092GF9       | GAYIAFPTF       | 6             |

\* Cardineau et al., 2004 J Exp Med

| <i>peptide #</i> | <i>Peptide name</i> | <i>Sequence</i> | <i>POOL #</i> |
|------------------|---------------------|-----------------|---------------|
| 443              | B58ORF_092FF9       | FSLCTLLLF       | 6             |
| 444              | B58ORF_092LF9       | LVNSSPVIF       | 6             |
| 445              | B58ORF_092AF9       | ASIALSKLF       | 6             |
| 446              | B58ORF_092GL9       | GSIFTLLYL       | 6             |
| 447              | B58ORF_092IF9       | IVSLPSVLF       | 6             |
| 448              | B58ORF_092KF9       | KAPIPTALF       | 6             |
| 449              | B58ORF_092LF9       | LMGGAYIAF       | 6             |
| # 450            | A2ORF_128SV9        | SVNCFSTLV       | 7             |
| 451              | A2ORF_128VV9        | VVIFCTASV       | 7             |
| 452              | A2ORF_128SL9        | SLVWAPLIL       | 7             |
| 453              | A2ORF_128IV9        | IQVACQSVV       | 7             |
| 454              | A2ORF_128MT9        | MLSVVIFCT       | 7             |
| 455              | A2ORF_128GL9        | GVFPHTTML       | 7             |
| 456              | A2ORF_128CV9        | CMGSLNLGV       | 7             |
| 457              | A2ORF_128PV9        | PLILAYFPV       | 7             |
| 458              | A2ORF_128LA9        | LVWAPLILA       | 7             |
| 459              | B7ORF_128FV9        | FPHTMLSV        | 8             |
| 460              | B7ORF_128HL9        | HVSFCMGSL       | 8             |
| X 461            | B58ORF_128LF9       | LAYFPVFRF       | 8             |
| 462              | B58ORF_128IF9       | ITMLSVVIF       | 8             |
| 463              | B58ORF_128SY9       | SGIQVACQY       | 8             |
| 464              | B58ORF_128HM9       | HVSHVFCM        | 8             |
| 465              | B58ORF_128VW9       | VNCFSTLVW       | 8             |
| 466              | B58ORF_128LF9       | LILAYFPVF       | 8             |
| 467              | A2ORF_141VI9        | VLYGFSGPI       | 9             |
| 468              | A2ORF_141FL9        | FTGTVSIGL       | 9             |
| 469              | B7ORF_141SF9        | SVQISTNAF       | 9             |
| 470              | B7ORF_141GF9        | GPSIPGFNF       | 9             |
| 471              | B7ORF_141FQ9        | FPSFSISVQ       | 9             |
| 472              | B58ORF_141FF9       | FSGPIFEIF       | 9             |
| 473              | B58ORF_141SF9       | SVNGHCLTF       | 9             |
| 474              | B58ORF_141VF9       | VSIGLMGKF       | 9             |
| 475              | B58ORF_141QF9       | QISTNAFIF       | 9             |
| 476              | B58ORF_141FL9       | FSSVNGHCL       | 9             |
| 477              | A2ORF_153FL9        | FVYLLMFL        | 10            |
| 478              | A2ORF_153MV9        | MVVAVPVFV       | 10            |
| 479              | A2ORF_153AL9        | AVPVFVYSL       | 10            |
| 480              | B7ORF_153VL9        | VPVFVYSL        | 10            |
| 481              | B58ORF_153VY9       | VVAVPVFVY       | 10            |
| 482              | B7ORF_083SL9        | SPVPPRPL        | 11            |
| 483              | B7ORF_083RP9        | RPRLPKSP        | 11            |
| 484              | B7ORF_083RP9        | RARHSPVPP       | 11            |
| 485              | B7ORF_084RM9        | RMQLSGHVM       | 11            |
| 486              | A2ORF_085LV9        | LLSYLAQLV       | 12            |
| 487              | A2ORF_085PL9        | PLLSYLAQL       | 12            |

# Bansal et al., 2010 J Exp Med

x Peptide close to AYFPVFRFL, Bansal et al., 2010 J Exp Med

| <i>peptide #</i> | <i>Peptide name</i> | <i>Sequence</i> | <i>POOL #</i> |
|------------------|---------------------|-----------------|---------------|
| 488              | A2ORF_085GL9        | GVTSWCSLL       | 12            |
| 489              | B58ORF_085TW9       | TSWCSLLYW       | 12            |
| 490              | B58ORF_085LL9       | LSYLAQLVL       | 12            |
| 491              | B58ORF_085VY9       | VTSWCSLLY       | 12            |
| 492              | B58ORF_085AW9       | AGSQGVTSW       | 12            |
| 493              | B58ORF_085LY9       | LLYWPLLSY       | 12            |
| 494              | B58ORF_086LY9       | LSSSHSFPY       | 11            |
| 495              | B58ORF_086CW9       | CCSHPICCW       | 11            |
| 496              | A2ORF_087ML9        | MLLPPYLLL       | 11            |
| 497              | A2ORF_087LA9        | LLPPYLLLA       | 11            |
| 498              | A2ORF_087AL9        | AQLVSFFPL       | 11            |
| 499              | B7ORF_087PL9        | PPYLLLAQL       | 11            |
| 500              | A2ORF_088AL9        | AMAVALSKL       | 13            |
| 501              | A2ORF_088CV9        | CTTSITLSV       | 13            |
| 502              | A2ORF_088LI9        | LQAPCTTSI       | 13            |
| 503              | A2ORF_088KS9        | KLTALFFSS       | 13            |
| 504              | B7ORF_088AL9        | APCTTSITL       | 13            |
| 505              | B7ORF_088VV9        | VPSATAMAV       | 13            |
| 506              | B7ORF_088SL9        | SATAMAVAL       | 13            |
| 507              | B7ORF_088VL9        | VALSKLTAL       | 13            |
| 508              | B58ORF_088LM9       | LSVPSATAM       | 13            |
| 509              | B58ORF_088LF9       | LSKLTALFF       | 13            |
| 510              | A2ORF_089SI9        | SLSPPSSSI       | 14            |
| 511              | B7ORF_089IL9        | IPSGLSGPL       | 14            |
| 512              | B7ORF_089SS9        | SPPSSSIPS       | 14            |
| 513              | A2ORF_090VL9        | VMLNQFHKL       | 14            |
| 514              | A2B58ORF_090FM9     | FIYHSQFVM       | 14            |
| 515              | B58ORF_090NW9       | NSCSFFSCW       | 14            |
| 516              | B7ORF_093SL9        | SPQQIVLLL       | 14            |
| 517              | A2ORF_094FI9        | FLLLYIYII       | 14            |
| 518              | A2ORF_094MI9        | MVQFLLLYI       | 14            |
| 519              | B7ORF_094CV9        | CPSYLLQV        | 14            |
| 520              | B58ORF_094LF9       | LLYIYIIHF       | 14            |
| 521              | A2ORF_095VV9        | VLQVLLNQV       | 12            |
| 522              | A2ORF_097LV9        | LIFPIFPIV       | 15            |
| 523              | A2ORF_097CI9        | CLIFPIFPI       | 15            |
| 524              | A2ORF_097LI9        | LLLGLVQLI       | 15            |
| 525              | A2ORF_097TV9        | TIMVLALSV       | 15            |
| 526              | A2ORF_097FV9        | FLVLLGLV        | 15            |
| 527              | A2ORF_097RL9        | RILFLVLL        | 15            |
| 528              | A2ORF_097VL9        | VLLGLVQL        | 15            |
| 529              | A2ORF_097KS9        | KLTDLITTS       | 15            |
| 530              | A2ORF_097AL9        | ALSVKLTDL       | 15            |
| 531              | B7ORF_097GF9        | GPLWIRILF       | 16            |
| 532              | B7ORF_097WL9        | WIRILFLVL       | 16            |

| <i>peptide #</i> | <i>Peptide name</i> | <i>Sequence</i> | <i>POOL #</i> |
|------------------|---------------------|-----------------|---------------|
| 533              | B58ORF_097TF9       | TSSSARLPF       | 15            |
| 534              | B58ORF_097IL9       | ITSSSARL        | 15            |
| 535              | A2ORF_098QI9        | QLYYYGFSI       | 16            |
| 536              | B58ORF_098LY9       | LSHISYFSY       | 16            |
| 537              | A2ORF_099FL9        | FFLYCCWVL       | 16            |
| 538              | A2ORF_099FV9        | FFFLYCCWV       | 16            |
| 539              | B58ORF_099VF9       | VLSGYGFFF       | 16            |
| 540              | B58ORF_099SY9       | SGYGFFFLY       | 16            |
| 541              | B58ORF_099GW9       | GFFFLYCCW       | 16            |
| 542              | A2ORF_100ML9        | MVLALSVKL       | 17            |
| 543              | B58ORF_101LW9       | LYCADICTW       | 17            |
| 544              | A2ORF_103VV9        | VMTEVLQLV       | 17            |
| 545              | A2ORF_103GV9        | GQACVMTEV       | 17            |
| 546              | A2ORF_103CL9        | CVMTVELQL       | 17            |
| 547              | B58ORF_103MF9       | MGIGSKDTF       | 17            |
| 548              | A2ORF_104FI9        | FISPFSSII       | 18            |
| 549              | A2ORF_104IV9        | IILPLLLL        | 18            |
| 550              | A2ORF_104LI9        | LILKEQFFI       | 18            |
| 551              | A2ORF_104VV9        | VLVSFFKSV       | 18            |
| 552              | A2B58ORF_104FL9     | FSIIILPLL       | 18            |
| 553              | A2ORF_104IL9        | ILPLLLLVL       | 18            |
| 554              | B58ORF_104VF9       | VSFFKSVHF       | 18            |
| 555              | B58ORF_104KF9       | KLTQSGVNF       | 18            |
| 556              | B58ORF_104SF9       | SGVNFTHGF       | 18            |
| 557              | A2ORF_105YI9        | YLCIICFSI       | 17            |
| 558              | B58ORF_105HW9       | HIYQYFLW        | 17            |
| 559              | B58ORF_105IF9       | IMYLCICF        | 17            |
| 560              | B58ORF_105KY9       | KIFCHIYQY       | 17            |
| 561              | B58ORF_106MF9       | MSFFHMLKF       | 19            |
| 562              | B58ORF_106HF9       | HMLKFSVTF       | 19            |
| 563              | A2ORF_110TI9        | TMDHTTIAI       | 18            |
| 564              | A2ORF_112SI9        | SLSPLLPAI       | 19            |
| 565              | B7ORF_112TL9        | TVLMSSSSL       | 19            |
| 566              | B58ORF_112SL9       | SSSSLSPLL       | 19            |
| 567              | A2B58ORF_114LL9     | LTSWMLPGL       | 19            |
| 568              | A2ORF_114AL9        | AIGTSSFRL       | 19            |
| 569              | B7ORF_114KI9        | KATLFTIAI       | 19            |
| 570              | B7ORF_114TF9        | TIAIGTSSF       | 19            |
| 571              | B58ORF_114TW9       | TSSFRLTSW       | 19            |
| 572              | B7ORF_115IL9        | IPISFIDML       | 20            |
| 573              | B7ORF_116NF9        | NPRKMSNSF       | 20            |
| 574              | B58ORF_116ML9       | MSNSFILKL       | 20            |
| 575              | A2ORF_117LI9        | LLVPSIVEI       | 20            |
| 576              | B7ORF_117LI9        | LPCYVLLDI       | 20            |
| 577              | B7ORF_119MQ9        | MPVSFSCMQ       | 20            |

| <b>peptide #</b> | <b>Peptide name</b> | <b>Sequence</b> | <b>POOL #</b> |
|------------------|---------------------|-----------------|---------------|
| 578              | B58ORF_120MF9       | MSIKPSPSF       | 20            |
| 579              | A2ORF_121FL9        | FQSGFLLSL       | 21            |
| 580              | A2ORF_121SA9        | SLLSCITTA       | 21            |
| 581              | A2ORF_121LL9        | LLGTTFMSL       | 21            |
| 582              | A2ORF_121MT9        | MIFAFLLGT       | 21            |
| 583              | A2ORF_121FS9        | FLLGTTFMS       | 21            |
| 584              | B7ORF_121AF9        | APSPFQRSF       | 21            |
| 585              | B7ORF_121GL9        | GPFQSGFLL       | 21            |
| 586              | B7ORF_121SG9        | SPFQRSFAG       | 21            |
| 587              | B58ORF_121FF9       | FAFLLGTTF       | 21            |
| 588              | B58ORF_121FF9       | FAGPFQSGF       | 21            |
| 589              | B58ORF_121RS9       | RSFAGPFQS       | 21            |
| 590              | A2ORF_123IA9        | IMSTILSPA       | 22            |
| 591              | A2ORF_123WA9        | WMNTAICTA       | 22            |
| 592              | A2ORF_123FT9        | FLLKLWMNT       | 22            |
| 593              | B7ORF_123SL9        | SVAIMSTIL       | 22            |
| 594              | B7ORF_123YL9        | YPPIPPFL        | 22            |
| 595              | B58ORF_123SY9       | STILSPALY       | 22            |
| 596              | B58ORF_123AF9       | ALYPPIPPF       | 22            |
