# Supplementary material for: Influence of HAART on Alternative Reading Frame Immune Responses over the Course of HIV-1 Infection
Source: PubMed Central journal article supplement (PMC3387156; doi:10.1371/journal.pone.0039311), 2012-06-29
Supplement: pone.0039311.s005.pdf [file pone.0039311.s005.pdf]

# Supplemental Table S5

| <b>POOL #</b> | <b>Pool content</b>                                               | <b>number of peptides in the pool</b> |
|---------------|-------------------------------------------------------------------|---------------------------------------|
| 1             | TAT and REV splicing variants peptides                            | 2                                     |
| 2             | HIV ARF sense A2 and B7 peptides                                  | 11                                    |
| 3             | HIV ARF sense B58 peptides                                        | 11                                    |
| 4             | HIV ARF 92 antisense A2 peptides                                  | 10                                    |
| 5             | HIV ARF 92 antisense A2 and B7 peptides                           | 9                                     |
| 6             | HIV ARF 92 antisense B58 peptides                                 | 9                                     |
| 7             | HIV ARF 128 antisense A2 peptides                                 | 9                                     |
| 8             | HIV ARF 128 antisense B7 and B58 peptides                         | 8                                     |
| 9             | HIV ARF 141 antisense A2, B7 and B58 peptides                     | 10                                    |
| 10            | HIV ARF 153 antisense A2, B7 and B58 peptides                     | 5                                     |
| 11            | HIV ARF 83, 84, 86, 87 antisense A2, B7 and B58 peptides          | 10                                    |
| 12            | HIV ARF 85, 95 antisense A2 and B58 peptides                      | 9                                     |
| 13            | HIV ARF 88 antisense A2, B7 and B58 peptides                      | 10                                    |
| 14            | HIV ARF 89, 90 93, 94 antisense A2, B7 and B58 peptides           | 11                                    |
| 15            | HIV ARF 92 antisense A2 and B58 peptides                          | 11                                    |
| 16            | HIV ARF 97, 98, 99 antisense A2, B7 and B58 peptides              | 9                                     |
| 17            | HIV ARF 100, 101, 103, 105 antisense A2 and B58 peptides          | 10                                    |
| 18            | HIV ARF 104, 110 antisense A2 and B58 peptides                    | 10                                    |
| 19            | HIV ARF 106, 112, 114 antisense A2, B7 and B58 peptides           | 10                                    |
| 20            | HIV ARF 115, 116, 117, 119, 120 antisense A2, B7 and B58 peptides | 7                                     |
| 21            | HIV ARF 121 antisense A2, B7 and B58 peptides                     | 11                                    |
| 22            | HIV ARF 123 antisense A2, B7 and B58 peptides                     | 7                                     |
