# Supplementary material for: Influence of HAART on Alternative Reading Frame Immune Responses over the Course of HIV-1 Infection
Source: PLoS One. 2012 Jun 29;7(6):e39311. doi: 10.1371/journal.pone.0039311 (PMC3387156; doi:10.1371/journal.pone.0039311)
Supplement: Table S2 — Complete description of nucleotide and amino acid sequences used in the study. (XLSX) [file pone.0039311.s002.xlsx]

## Sheet: Table S2
Name	Direction	Frame	Nucleotide Sequence	LANL start	LANL end	Nucleotide Length	Amino Acid Sequence	Amino Acid Length
ORF 3	forward	3	AUGGGUAAAAGUAGUAGAAGAGAAGGCUUUCAGCCCAGAAGUGAUACCCAUGUUUUCAGCAUUAUCAGAAGGAGCCACCCCACAAGAUUUAAACACCAUGCUAAACACAGUGGGGGGACAUCAAGCAGCCAUGCAAAUGUUAAAAGAGACCAUCAAUGA	1251	1409	159	MGKSSRREGFQPRSDTHVFSIIRRSHPTRFKHHAKHSGGTSSSHANVKRDHQ*	52
ORF 8	forward	2	AUGAGGAAGCUGCAGAAUGGGAUAGAGUGCAUCCAGUGCAUGCAGGGCCUAUUGCACCAGGCCAGAUGA	1406	1474	69	MRKLQNGIECIQCMQGLLHQAR*	22
ORF 20	forward	2	AUGGAAACCAAAAAUGAUAGGGGGAAUUGGAGGUUUUAUCAAAGUAAGACAGUAUGA	2375	2431	57	METKNDRGNWRFYQSKTV*	18
ORF 23	forward	2	AUGGCCAUUGACAGAAGAAAAAAUAAAAGCAUUAGUAGAAAUUUGUACAGAGAUGGAAAAGGAAGGGAAAAUUUCAAAAAUUGGGCCUGA	2618	2707	90	MAIDRRKNKSISRNLYRDGKGRENFKNWA*	29
ORF 32	forward	2	AUGGUACCAGUUAGAGAAAGAACCCAUAGUAGGAGCAGAAACCUUCUAUGUAGAUGGGGCAGCUAA	3824	3889	66	MVPVRERTHSRSRNLLCRWGS*	21
ORF 33	forward	1	AUGAACAUGAGAAAUAUCACAGUAAUUGGAGAGCAAUGGCUAGUGAUUUUAACCUGCCACCUGUAG	4258	4323	66	MNMRNITVIGEQWLVILTCHL*	21
ORF 37	forward	2	AUGGCAACUAGAUUGUACACAUUUAGAAGGAAAAGUUAUCCUGGUAGCAGUUCAUGUAGCCAGUGGAUAUAUAGAAGCAGAAGUUAUUCCAGCAGAAACAGGGCAGGAAACAGCAUAUUUUCUUUUAAAAUUAGCAGGAAGAUGGCCAGUAAAAACAAUACAUACUGA	4409	4576	168	MATRLYTFRRKSYPGSSSCSQWIYRSRSYSSRNRAGNSIFSFKISRKMASKNNTY*	55
ORF 45	forward	2	AUGUUUCAGGGAAAGCUAGGGGAUGGUUUUAUAGACAUCACUAUGAAAGCCCUCAUCCAAGAAUAA	5129	5194	66	MFQGKLGDGFIDITMKALIQE*	21
ORF 62	forward	2	AUGGGAUCAAAGCCUAAAGCCAUGUGUAAAAUUAACCCCACUCUGUGUUAG	6557	6607	51	MGSKPKAMCKINPTLC*	16
ORF 65	forward	1	AUGGAACAGGACCAUGUACAAAUGUCAGCACAGUACAAUGUACACAUGGAAUUAGGCCAGUAG	6925	6987	63	MEQDHVQMSAQYNVHMELGQ*	20
ORF 67	forward	2	AUGCAGAAUAAAACAAAUUAUAAACAUGUGGCAGAAAGUAGGAAAAGCAAUGUAUGCCCCUCCCAUCAGUGGACAAAUUAG	7475	7555	81	MQNKTNYKHVAESRKSNVCPSHQWTN*	26
ORF 70	forward	1	AUGCCCCUCCCAUCAGUGGACAAAUUAGAUGUUCAUCAAAUAUUACAGGGCUGCUAUUAA	7528	7587	60	MPLPSVDKLDVHQILQGCY*	19
ORF 71	forward	1	AUGGUGGUAAUAGCAACAAUGAGUCCGAGAUCUUCAGACCUGGAGGAGGAGAUAUGA	7594	7650	57	MVVIATMSPRSSDLEEEI*	18
ORF 83	reverse	1	AUGCAGGAUCUGAGGGCUCGCCACUCCCCAGUCCCGCCCAGGCCACGCCUCCCUGGAAAGUCCCCAGCGGAAAGUCCCUUGUAG	9429	9512	84	MQDLRARHSPVPPRPRLPGKSPAESPL*	27
ORF 84	reverse	3	AUGUCAGCAGUUCUUGAAGUACUCCGGAUGCAGCUCUCGGGCCACGUGAUGAAAUGCUAG	9361	9420	60	MSAVLEVLRMQLSGHVMKC*	19
ORF 85	reverse	2	AUGCUAGGCGGCUGUCAAACCUCCACUCUAACACUUCUCUCUCCGGGUCAUCCAUCCCAUGCAGGCUCACAGGGUGUAACAAGCUGGUGUUCUCUCCUUUAUUGGCCUCUUCUAUCUUAUCUGGCUCAACUGGUACUAGCUUGUAGCACCAUCCAAAGGUCAGUGGAUAUCUGA	9194	9367	174	MLGGCQTSTLTLLSPGHPSHAGSQGVTSWCSLLYWPLLSYLAQLVLACSTIQRSVDI*	57
ORF 86	reverse	3	AUGUUUUUCCAGGUCUCGAGAUGCUGCUCCCACCCUAUCUGCUGCUGGCUCAGCUCGUCUCAUUCUUUCCCUUACAGUAGGCCAUCCAAUCACACUACUUUUUGA	8812	8916	105	MFFQVSRCCSHPICCWLSSSHSFPYSRPSNHTTF*	34
ORF 87	reverse	2	AUGCUGCUCCCACCCUAUCUGCUGCUGGCUCAGCUCGUCUCAUUCUUUCCCUUACAGUAG	8837	8896	60	MLLPPYLLLAQLVSFFPLQ*	19
ORF 88	reverse	2	AUGUGGCGAAUAGCUCUACAAGCUCCUUGUACUACUUCUAUAACCCUAUCUGUCCCCUCAGCUACUGCUAUGGCUGUGGCAUUGAGCAAGCUAACAGCACUAUUCUUUAGUUCCUGA	8636	8752	117	MWRIALQAPCTTSITLSVPSATAMAVALSKLTALFFSS*	38
ORF 89	reverse	2	AUGGAUCUGUCUCUGUCUCUCUCUCCACCUUCUUCUUCUAUUCCUUCGGGCCUGUCGGGUCCCCUCGGGGUUGGGAGGUGGGUCUGA	8375	8461	87	MDLSLSLSPPSSSIPSGLSGPLGVGRWV*	28
ORF 90	reverse	2	AUGAAUAAUUUUAUAUACCACAGCCAAUUUGUUAUGUUAAACCAAUUCCACAAACUUGCCCAUUUAUCUAAUUCCAAUAAUUCUUGUUCAUUCUUUUCUUGCUGGUUUUGCGAUUCUUCAAUUAAGGAGUGUAUUAAGCUUGUGUAA	8135	8281	147	MNNFIYHSQFVMLNQFHKLAHLSNSNNSCSFFSCWFCDSSIKECIKLV*	48
ORF 92	reverse	2	AUGCCCCAGACUGUGAGUUGCAACAGAUGCUGUUGCGCCUCAAUAGCCCUCAGCAAAUUGUUCUGCUGCUGCACUAUACCAGACAAUAAUUGUCUGGCCUGUACCGUCAGCGUCAUUGAGGCUGCGCCCAUAGUGCUUCCUGCUGCUCCCAAGAACCCAAGGAACAAAGCUCCUAUUCCCACUGCUCUUUUUUCUCUCUGCACCACUCUUCUCUUUGCCUUGGUGGGUGCUACUCCUAAUGGUUCAAUUUUUACUACUUUAUAUUUAUAUAAUUCACUUCUCCAAUUGUCCCUCAUAUCUCCUCCUCCAGGUCUGAAGAUCUCGGACUCAUUGUUGCUAUUACCACCAUCUCUUGUUAAUAGCAGCCCUGUAAUAUUUGAUGAACAUCUAAUUUGUCCA…	7373	7942	570	MPQTVSCNRCCCASIALSKLFCCCTIPDNNCLACTVSVIEAAPIVLPAAPKNPRNKAPIPTALFSLCTTLLFALVGATPNGSIFTTLYLYNSLLQLSLISPPPGLKISDSLLLLPPSLVNSSPVIFDEHLICPLMGGAYIAFPTFCHMFIICFILHGRVIVSLPSVLFDPSVLQVLLNQVLLNSCVELQ*	189
ORF 93	reverse	1	AUGCUGUUGCGCCUCAAUAGCCCUCAGCAAAUUGUUCUGCUGCUGCACUAUACCAGACAAUAA	7854	7916	63	MLLRLNSPQQIVLLLHYTRQ*	20
ORF 94	reverse	3	AUGGUUCAAUUUUUACUACUUUAUAUUUAUAUAAUUCACUUCUCCAAUUGUCCCUCAUAUCUCCUCCUCCAGGUCUGA	7627	7704	78	MVQFLLLYIYIIHFSNCPSYLLLQV*	25
ORF 95	reverse	2	AUGGGAGGGGCAUACAUUGCUUUUCCUACUUUCUGCCACAUGUUUAUAAUUUGUUUUAUUCUGCAUGGGAGGGUGAUUGUGUCACUUCCUUCAGUGUUAUUUGACCCUUCAGUACUCCAAGUACUAUUAAACCAAGUACUAUUAAACAGUUGUGUUGAAUUACAGUAG	7373	7540	168	MGGAYIAFPTFCHMFIICFILHGRVIVSLPSVLFDPSVLQVLLNQVLLNSCVELQ*	55
ORF 97	reverse	2	AUGUUACAAUGUGCUUGUCUCAUAUUUCCUAUUUUUCCUAUUGUAACAAAUGCUCUCCCUGGUCCUCUCUGGAUACGGAUUCUUUUUCUUGUAUUGUUGUUGGGUCUUGUACAAUUAAUUUCUACAGAUGUGUUCAGCUGUACUAUUAUGGUUUUAGCAUUGUCCGUGAAAUUGACAGAUCUAAUUACUACCUCUUCUUCUGCUAGACUGCCAUUUAACAGCAGUUGA	6995	7222	228	MLQCACLIFPIFPIVTNALPGPLWIRILFLVLLLGLVQLISTDVFSCTIMVLALSVKLTDLITTSSSARLPFNSS*	75
ORF 98	reverse	1	AUGUGCUUGUCUCAUAUUUCCUAUUUUUCCUAUUGUAACAAAUGCUCUCCCUGGUCCUCUCUGGAUACGGAUUCUUUUUCUUGUAUUGUUGUUGGGUCUUGUACAAUUAAUUUCUACAGAUGUGUUCAGCUGUACUAUUAUGGUUUUAGCAUUGUCCGUGAAAUUGACAGAUCUAAUUACUACCUCUUCUUCUGCUAG	7017	7214	198	MCLSHISYFSYCNKCSPWSSLDTDSFSCIVVGSCTINFYRCVQLYYYGFSIVREIDRSNYYLFFC*	65
ORF 99	reverse	3	AUGCUCUCCCUGGUCCUCUCUGGAUACGGAUUCUUUUUCUUGUAUUGUUGUUGGGUCUUGUACAAUUAA	7105	7173	69	MLSLVLSGYGFFFLYCCWVLYN*	22
ORF 100	reverse	2	AUGGUUUUAGCAUUGUCCGUGAAAUUGACAGAUCUAAUUACUACCUCUUCUUCUGCUAGACUGCCAUUUAACAGCAGUUGA	6995	7075	81	MVLALSVKLTDLITTSSSARLPFNSS*	26
ORF 101	reverse	1	AUGUGUACAUUGUACUGUGCUGACAUUUGUACAUGGUCCUGUUCCAUUGAACGUCUUAUUAUUACAUUUUAG	6900	6971	72	MCTLYCADICTWSCSIERLIITF*	23
ORF 103	reverse	2	AUGGGAAUUGGCUCAAAGGAUACCUUUGGACAGGCCUGUGUAAUGACUGAGGUGUUACAACUUGUCAACUUAUAG	6794	6868	75	MGIGSKDTFGQACVMTEVLQLVNL*	24
ORF 104	reverse	2	AUGCUUGUGCUGAUAUUGAAAGAGCAGUUUUUUAUCUCUCCUUUCUCCAUUAUCAUUCUCCCGCUACUACUAUUGGUAUUAGUAUCAUUCUUCAAAUCAGUGCACUUUAAACUAACACAGAGUGGGGUUAAUUUUACACAUGGCUUUAGGCUUUGA	6563	6718	156	MLVLILKEQFFISPFSIIILPLLLLVLVSFFKSVHFKLTQSGVNFTHGFRL*	51
ORF 105	reverse	1	AUGCAUCUGUUCUACCAUGUCAUUUUUCCACAUGUUAAAAUUUUCUGUCACAUUUACCAAUACUACUUCUUGUGGGUUGGGGUCUGUGGGUACACAGGCAUGUGUGGCCCAAACAUUAUGUACCUCUGUAUCAUAUGCUUUAGCAUCUGA	6390	6539	150	MHLFYHVIFPHVKIFCHIYQYYFLWVGVCGYTGMCGPNIMYLCIICFSI*	49
ORF 106	reverse	2	AUGUCAUUUUUCCACAUGUUAAAAUUUUCUGUCACAUUUACCAAUACUACUUCUUGUGGGUUGGGGUCUGUGGGUACACAGGCAUGUGUGGCCCAAACAUUAUGUACCUCUGUAUCAUAUGCUUUAGCAUCUGAUGCACAAAAUAGAGUGGUGGUUGCUUCCUUCCACACAGGUACCCCAUAA	6341	6523	183	MSFFHMLKFSVTFTNTTSCGLGSVGTQACVAQTLCTSVSYALASDAQNRVVVASFHTGTP*	60
ORF 110	reverse	3	AUGAUUACUAUGGACCACACAACUAUUGCUAUUAUUAUUGCUACUACUAAUGCUACUAUUGCUACUAUUGGUAUAGGUUGCAUUACAUGUACUACUUACUGCUUUGAUAGAGAAGCUUGA	6025	6144	120	MITMDHTTIAIIIATTNATIATIGIGCITCTTYCFDREA*	39
ORF 112	reverse	2	AUGAGUCUGACUGUUCUGAUGAGCUCUUCGUCGCUGUCUCCGCUUCUUCCUGCCAUAGGAGAUGCCUAA	5957	6025	69	MSLTVLMSSSSLSPLLPAIGDA*	22
ORF 114	reverse	2	AUGAAAGCAACACUUUUUACAAUAGCAAUUGGUACAAGCAGUUUUAGGCUGACUUCCUGGAUGCUUCCAGGGCUCUAG	5852	5929	78	MKATLFTIAIGTSSFRLTSWMLPGL*	25
ORF 115	reverse	1	AUGGAUAAACAGCAGUUGUUGCAGAAUUCUUAUUAUGGCUUCCACUCCUGCCCAAGUAUCCCCAUAAGUUUCAUAGAUAUGUUGCCCUAA	5682	5771	90	MDKQQLLQNSYYGFHSCPSIPISFIDMLP*	29
ORF 116	reverse	1	AUGGAGCCAAAUCCUAGGAAAAUGUCUAACAGCUUCAUUCUUAAGCUCCUCUAA	5625	5678	54	MEPNPRKMSNSFILKLL*	17
ORF 117	reverse	2	AUGCUGCUAGUGCCAAGUAUUGUAGAGAUCCUACCUUGUUAUGUCCUGCUUGAUAUUCACACCUAG	5432	5497	66	MLLVPSIVEILPCYVLLDIHT*	21
ORF 119	reverse	3	AUGCCAGUCUCUUUCUCCUGUAUGCAGACCCCAAUAUGUUGUUAUUACCAAUCUAGCAUCCCCUAG	5215	5280	66	MPVSFSCMQTPICCYYQSSIP*	21
ORF 120	reverse	3	AUGAGGGCUUUCAUAGUGAUGUCUAUAAAACCAUCCCCUAGCUUUCCCUGA	5134	5184	51	MRAFIVMSIKPSPSFP*	16
ORF 121	reverse	2	AUGAUCUUUGCUUUUCUUCUUGGCACUACUUUUAUGUCACUAUUAUCUUGUAUUACUACUGCCCCUUCACCUUUCCAGAGGAGCUUUGCUGGUCCUUUCCAAAGUGGAUUUCUGCUGUCCCUGUAA	5032	4907	125	MIFAFLLGTTFMSLLSCITTAPSPFQRSFAGPFQSGFLLSL*	41
ORF 123	reverse	2	AUGUCUGUUGCUAUUAUGUCUACUAUUCUUUCCCCUGCACUGUACCCCCCAAUCCCCCCUUUUCUUUUAAAAUUGUGGAUGAAUACUGCCAUUUGUACUGCUGUCUUAAGAUGUUCAGCCUGA	4852	4730	122	MSVAIMSTILSPALYPPIPPFLLKLWMNTAICTAVLRCSA*	40
ORF 128	reverse	2	AUGGGUUCUUUCUCUAACUGGUACCAUAAUUUCACUAAGGGAGGGGUAUUAACAAACUCCCACUCAGGAAUCCAGGUGGCUUGCCAAUACUCUGUCCACCAUGUUUCCCAUGUUUCCUUUUGUAUGGGCAGUUUAAAUUUAGGAGUCUUUCCCCAUAUUACUAUGCUUUCUGUGGUUAUUUUUUGCACUGCCUCUGUUAAUUGUUUUACAUCAUUAGUGUGGGCACCCCUCAUUCUUGCAUAUUUUCCUGUUUUCAGAUUUUUAAAUGGCUCUUGA	3850	3575	275	MGSFSNWYHNFTKGGVLTNSHSGIQVACQYSVHHVSHVSFCMGSLNLGVFPHITMLSVVIFCTASVNCFTSLVWAPLILAYFPVFRFLNGS*	91
ORF 141	reverse	2	AUGGCAAAUACUGGAGUAUUGUAUGGAUUUUCAGGCCCAAUUUUUGAAAUUUUCCCUUCCUUUUCCAUCUCUGUACAAAUUUCUACUAAUGCUUUUAUUUUUUCUUCUGUCAAUGGCCAUUGUUUAACUUUUGGGCCAUCCAUUCCUGGCUUUAAUUUUACUGGUACAGUCUCAAUAGGGCUAAUGGGAAAAUUUAAAGUGCAACCAAUCUGA	2737	2525	212	MANTGVLYGFSGPIFEIFPSFSISVQISTNAFIFSSVNGHCLTFGPSIPGFNFTGTVSIGLMGKFKVQPI*	70
ORF 153	reverse	2	AUGGUUGUAGCUGUCCCAGUAUUUGUCUACAGCCUUCUGAUGUUUCUAACAGGCCAGGAUUAA	988	926	62	MVVAVPVFVYSLLMFLTGQD*	20
